# Supplementary material for: LPS-induced systemic inflammation reveals an immunomodulatory role for the prion protein at the blood-brain interface
Source: PubMed Central journal article supplement (PMC5441080; doi:10.1186/s12974-017-0879-5), 2017-05-22
Supplement: 12974_2017_879_MOESM1_ESM.pdf [file 12974_2017_879_MOESM1_ESM.pdf]

## Additional file 1 – Material and methods

### a) Study groups showing treatment, animal number, mean age, mean weight and sex.

| Treatment | Genotype                       | Animal number | Mean age (months)  | Mean weight (kg)    | Sex            |
|-----------|--------------------------------|---------------|--------------------|---------------------|----------------|
| LPS       | <i>PRNP</i> <sup>+/+</sup>     | 8             | 7,3 (±0,3)         | 27,3 (±2,7)         | 8♀             |
|           | <i>PRNP</i> <sup>Ter/Ter</sup> | 8             | 6,7 (±1,1)         | 26,1 (±4,6)         | 7♀, 1♂         |
| Saline    | <i>PRNP</i> <sup>+/+</sup>     | 5             | 6,7 (±0,2)         | 21,5 (±3,2)         | 5♀             |
|           | <i>PRNP</i> <sup>Ter/Ter</sup> | 5             | 6,6 (±0,03)        | 24,9 (±2,8)         | 5♀             |
|           |                                | <b>26</b>     | <b>6,9 (± 0,7)</b> | <b>25,3 (± 3,9)</b> | <b>25♀, 1♂</b> |

**b) Experimental protocol.** The LPS-group (8 *PRNP*<sup>Ter/Ter</sup> and 8 *PRNP*<sup>+/+</sup>) received a dual dose of LPS with a 24 hour time interval between doses; 0.1 µg/kg (day 1) and 0.05 µg/kg (day 2). A control group of 10 goats (5 *PRNP*<sup>Ter/Ter</sup> and 5 *PRNP*<sup>+/+</sup>) received corresponding volumes of sterile saline. Blood samples (EDTA and whole blood) were taken at 0 h (baseline), and at 1 h, 2 h, 5 h and 24 h. Goats were euthanized 5 h after day 2 LPS challenge, and tissue samples for RNA sequencing and histology/IHC were collected.

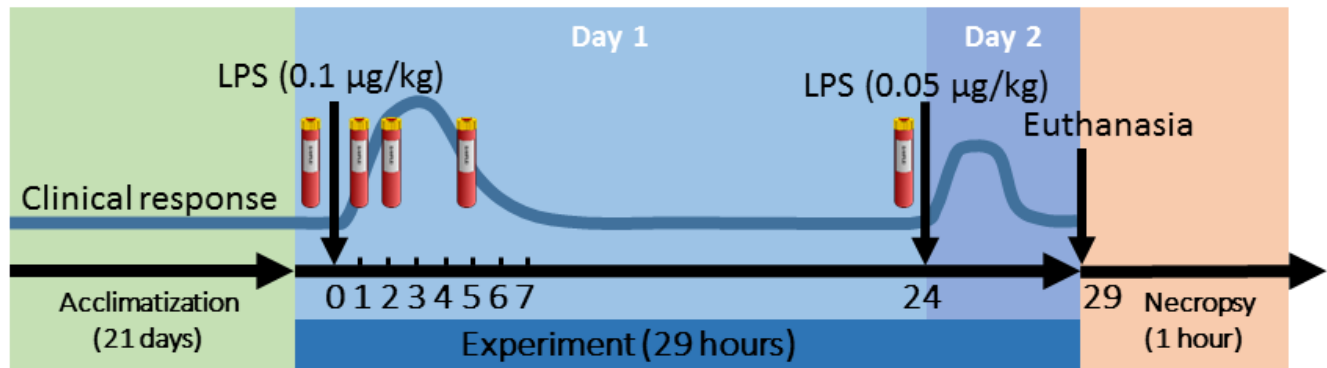

**c) RNA quality control.** Purity was based on OD<sub>260/280</sub> and OD<sub>260/230</sub> absorbance reading using DeNovix DS-11 spectrophotometer (Wilmington, USA). RNA integrity was assessed by Agilent Bioanalyzer system.

| Tissue            | Treatment | Group                          | OD <sub>260/280</sub> | OD <sub>260/230</sub> | Mean RIN    | Novogene RIN* |
|-------------------|-----------|--------------------------------|-----------------------|-----------------------|-------------|---------------|
| Hippocampus       | LPS       | <i>PRNP</i> <sup>Ter/Ter</sup> | 2.1 (±0.14)           | 2.2 (±0.07)           | 7.4 (±0.32) | 7.9           |
|                   |           | <i>PRNP</i> <sup>+/+</sup>     | 2.1 (±0.07)           | 2.1 (±0.07)           | 6.9 (±0.49) | 7.3           |
|                   | Saline    | <i>PRNP</i> <sup>Ter/Ter</sup> | 2.1 (±0.16)           | 2.2 (±0.11)           | 7.0 (±0.23) | 7.3           |
|                   |           | <i>PRNP</i> <sup>+/+</sup>     | 2.1 (±0.10)           | 2.2 (±0.09)           | 6.7 (±0.44) | 7.1           |
| Plexus choroideus | LPS       | <i>PRNP</i> <sup>Ter/Ter</sup> | 2.1 (±0.06)           | 2.1 (±0.14)           | 8.5 (±0.15) | 9.1           |
|                   |           | <i>PRNP</i> <sup>+/+</sup>     | 2.1 (±0.04)           | 2.2 (±0.05)           | 8.5 (±0.23) | 9.1           |
|                   | Saline    | <i>PRNP</i> <sup>Ter/Ter</sup> | 2.1 (±0.03)           | 2.2 (±0.03)           | 8.6 (±0.11) | 8.9           |
|                   |           | <i>PRNP</i> <sup>+/+</sup>     | 2.1 (±0.07)           | 2.1 (±0.18)           | 8.3 (±0.66) | 8.7           |

\* Novogene quality control on pooled samples before RNA sequencing. All samples were assessed as being of the best quality level (A level).

#### d) RNA sequencing - quality control summary

| Sample   | Raw reads | Clean reads | clean bases | Error rate (%) | Q20 (%) | Q30 (%) | GC content (%) |
|----------|-----------|-------------|-------------|----------------|---------|---------|----------------|
| Hi_L_Ter | 29491364  | 29011306    | 4.35G       | 0.01           | 98.13   | 95.56   | 50.29          |
| Hi_L_Nrm | 44613392  | 43879676    | 6.58G       | 0.01           | 97.98   | 95.26   | 49.86          |
| Hi_C_Ter | 36437780  | 35798088    | 5.37G       | 0.01           | 97.97   | 95.27   | 50.46          |
| Hi_C_Nrm | 33616850  | 33064478    | 4.96G       | 0.01           | 97.97   | 95.22   | 50.16          |
| PI_L_Ter | 32970148  | 32247800    | 4.84G       | 0.01           | 97.77   | 94.76   | 51.22          |
| PI_L_Nrm | 36319188  | 35355340    | 5.3G        | 0.01           | 98.24   | 95.77   | 50.71          |
| PI_C_Ter | 36164222  | 35219560    | 5.28G       | 0.01           | 98.22   | 95.71   | 50.61          |
| PI_C_Nrm | 34593166  | 33672136    | 5.05G       | 0.01           | 98.13   | 95.52   | 50.17          |

#### e) RNA sequencing - overview of mapping status

| Sample           | Hi_L_Ter          | Hi_L_Nrm          | Hi_C_Ter          | Hi_C_Nrm          | PI_L_Ter          | PI_L_Nrm          | PI_C_Ter          | PI_C_Nrm          |
|------------------|-------------------|-------------------|-------------------|-------------------|-------------------|-------------------|-------------------|-------------------|
| Total reads      | 29011306          | 43879676          | 35798088          | 33064478          | 32247800          | 35355340          | 35219560          | 33672136          |
| Total mapped     | 22835125 (78.71%) | 34333597 (78.24%) | 27539126 (76.93%) | 25520388 (77.18%) | 25094428 (77.82%) | 28358931 (80.21%) | 28505198 (80.94%) | 27394726 (81.36%) |
| Multiple mapped  | 445358 (1.54%)    | 731596 (1.67%)    | 553167 (1.55%)    | 546319 (1.65%)    | 521416 (1.62%)    | 554083 (1.57%)    | 523055 (1.49%)    | 580696 (1.72%)    |
| Uniquely mapped  | 22389767 (77.18%) | 33602001 (76.58%) | 26985959 (75.38%) | 24974069 (75.53%) | 24573012 (76.2%)  | 27804848 (78.64%) | 27982143 (79.45%) | 26814030 (79.63%) |
| Read-1           | 11467892 (39.53%) | 17262764 (39.34%) | 13842319 (38.67%) | 12847045 (38.85%) | 12699443 (39.38%) | 14219284 (40.22%) | 14331584 (40.69%) | 13764042 (40.88%) |
| Read-2           | 10921875 (37.65%) | 16339237 (37.24%) | 13143640 (36.72%) | 12127024 (36.68%) | 11873569 (36.82%) | 13585564 (38.43%) | 13650559 (38.76%) | 13049988 (38.76%) |
| Reads map to '+' | 11176520 (38.52%) | 16779682 (38.24%) | 13457666 (37.59%) | 12446395 (37.64%) | 12266866 (38.04%) | 13892065 (39.29%) | 13977428 (39.69%) | 13390416 (39.77%) |
| Reads map to '-' | 11213247 (38.65%) | 16822319 (38.34%) | 13528293 (37.79%) | 12527674 (37.89%) | 12306146 (38.16%) | 13912783 (39.35%) | 14004715 (39.76%) | 13423614 (39.87%) |
| Non-splice reads | 16285571 (56.14%) | 24639305 (56.15%) | 19595841 (54.74%) | 18366362 (55.55%) | 14845008 (46.03%) | 17260417 (48.82%) | 17586663 (49.93%) | 17013798 (50.53%) |
| Splice reads     | 6104196 (21.04%)  | 8962696 (20.43%)  | 7390118 (20.64%)  | 6607707 (19.98%)  | 9728004 (30.17%)  | 10544431 (29.82%) | 10395480 (29.52%) | 9800232 (29.1%)   |

#### f) Primer sequences used for qPCR

| Gene ID   | Symbol | Gene name                            | Primer sequences                                                | Reference |
|-----------|--------|--------------------------------------|-----------------------------------------------------------------|-----------|
| 102179831 | ACTB   | Actin beta                           | F: 5'TGCCCTGAGGCTCTCTCCA<br>R: 5'TGCGGATGTCGACGTCACA            | [1]       |
| 102169975 | PRNP   | Prion protein                        | F: 5'GTGGCTACATGCTGGGAAGT<br>R: 5'AGCCTGGGATTCTCTCTGGT          |           |
| 102185230 | IFI6   | Interferon alpha inducible protein 6 | F: 5'TATCGCTGTTCTCTGTGCTACC<br>R: 5'AAGCTCGAGTCGCTGTTTTC        |           |
| 100860873 | CXCL10 | C-X-C motif chemokine ligand 10      | F: 5'ACGCTGTACCTGCATCGAG<br>R: 5'GCAGGATTGACTTGCAGGA            |           |
| 102168428 | SAA3   | Serum amyloid A3                     | F: 5'CTGGGCTGCTAAAGTGATCAGTAAC<br>R: 5'CCCTTGAGCAGAGGGTCTGTGATT | [2]       |

- Zhang Y, Zhang XD, Liu X, Li YS, Ding JP, Zhang XR, et al. Reference gene screening for analyzing gene expression across goat tissue. Asian-Australasian journal of animal sciences. 2013;26(12):1665-71.
- Brenaut P, Lefèvre L, Rau A, Laloë D, Pisoni G, Moroni P, et al. Contribution of mammary epithelial cells to the immune response during early stages of a bacterial infection to Staphylococcus aureus. Vet Res. 2014;45:16.
