# Supplementary material for: LPS-induced systemic inflammation reveals an immunomodulatory role for the prion protein at the blood-brain interface
Source: PubMed Central journal article supplement (PMC5441080; doi:10.1186/s12974-017-0879-5), 2017-05-22
Supplement: 12974_2017_879_MOESM4_ESM.pdf [file 12974_2017_879_MOESM4_ESM.pdf]

**Additional file 4. Gene ontology analyses of differentially expressed genes (DEGs).** The overall LPS effect was characterized by GO analyses of DEGs. The fold enrichment displays the over-representation of genes in a given biological process, compared with the expected number in the reference genome (*Homo sapiens*). P-value <0.05 represents a statistically significant over-representation and is calculated by the binomial test.

**a) GO over-representation test of 92 up-regulated genes in the choroid plexus after LPS challenge.**

| GO biological process                                   | Genes | Gene names                                                                                                                                                  | Fold | P-value  |
|---------------------------------------------------------|-------|-------------------------------------------------------------------------------------------------------------------------------------------------------------|------|----------|
| Type I interferon signaling pathway (GO:0060337)        | 11    | IFITM3, IFIT1, IFIT2, IFIT3, OAS1, OAS3, PSMB8, MX1, RSAD2, IFI6, ISG15                                                                                     | 45.2 | 1.49E-11 |
| Positive regulation of leukocyte migration (GO:0002687) | 7     | CXCL9, CXCL10, CXCL12, CXCL14, LGALS9, SELP, PLVAP                                                                                                          | 15.5 | 0.0034   |
| Extracellular matrix organization (GO:0030198)          | 12    | COL1A2, COL3A1, COL4A1, COL4A2, COL6A1, COL6A2, COL16A1, ITGA1, FBLN1, VCAN, LCP1, ENG                                                                      | 10.0 | 2.66E-05 |
| Defense response to other organism (GO:0098542)         | 17    | IFITM3, DDX58, CXCL9, MYLK, CXCL10, COCH, B2M, IFIT2, SELP, IFIT3, MX1, OAS1, RSAD2, IFIT1, ISG15, OAS3, GBP6                                               | 8.8  | 6.88E-08 |
| Response to cytokine (GO:0034097)                       | 23    | CXCL9, CXCL10, CD14, B2M, PSMB9, LGALS9, TGM2, IFIT2, IFIT3, PLVAP, CHI3L1, PSMB8, IFITM3, MX1, OAS1, CXCL12, RSAD2, IFIT1, COL3A1, IFI6, ISG15, OAS3, GBP6 | 7.9  | 5.63E-11 |
| Innate immune response (GO:0045087)                     | 19    | DDX58, CD14, B2M, C7, C1QB, LGALS9, IFIT2, C1R, IFIT3, PSMB8, MX1, OAS1, RSAD2, IFIT1, IFI6, ISG15, IFITM3, OAS3, GBP6                                      | 7.9  | 2.01E-08 |

**b) GO over-representation test of 10 up-regulated genes in the hippocampus after LPS challenge.**

| GO biological process                            | Genes | Gene names                     | Fold | P-value |
|--------------------------------------------------|-------|--------------------------------|------|---------|
| Cytokine-mediated signaling pathway (GO:0019221) | 5     | MT2, CXCL9, CXCL10, TGM2, IFI6 | 22.5 | 0.010   |

**c) GO over-representation test of 25 down-regulated genes in the choroid plexus after LPS challenge.**

| GO biological process                           | Genes | Gene names                                                                                             | Fold | P-value |
|-------------------------------------------------|-------|--------------------------------------------------------------------------------------------------------|------|---------|
| Cellular hormone metabolic process (GO:0034754) | 5     | LRAT, RBP4, RDH10, CACNA1H, UGT1A1                                                                     | 40.3 | 0.016   |
| Retinoid metabolic process (GO:0001523)         | 4     | LRAT, RBP4, RDH10, UGT1A1                                                                              | 37.7 | 0.032   |
| Regulation of biological quality (GO:0065008)   | 15    | WNK1, SGK1, METAP1, LRAT, CEMIP, RBP4, RDH10, CLDN1, TXNRD1, PDK4, CACNA1H, UGT1A1, UBB, FGF10, TGFBR3 | 3.5  | 0.013   |
