# Supplementary material for: LPS-induced systemic inflammation reveals an immunomodulatory role for the prion protein at the blood-brain interface
Source: Springer Nature journal article supplement (doi:10.1186/s12974-017-0879-5), 2017-05-22

## Additional file 2: Hematology and biochemistry

**a) Hematology after day 1 LPS challenge (0.1  $\mu\text{g}/\text{kg}$ ).** EDTA blood tubes were collected before LPS challenge (0 h), and at 1 h, 5 h, and 24 h after LPS challenge. Figures show circulating levels of neutrophils, lymphocytes, monocytes and basophils at the indicated time points.  $n = 16$

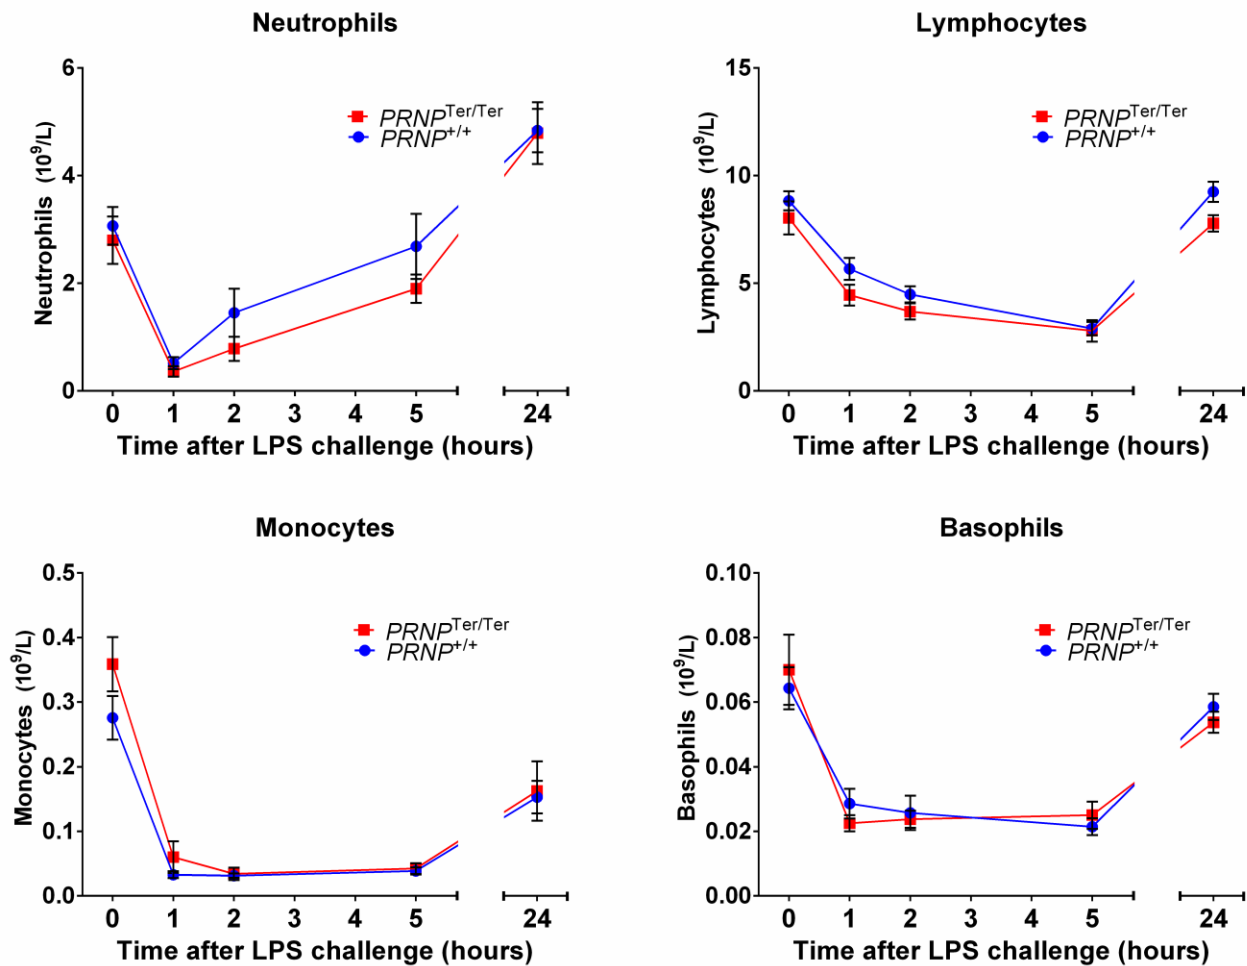

**b) Biochemical parameters after day 1 LPS challenge (0.1 µg/kg).** Serum was collected before LPS challenge (0 h), and at 1 h, 5 h, and 24 h after LPS challenge. \*p<0.05; \*\*p<0.01. n = 16

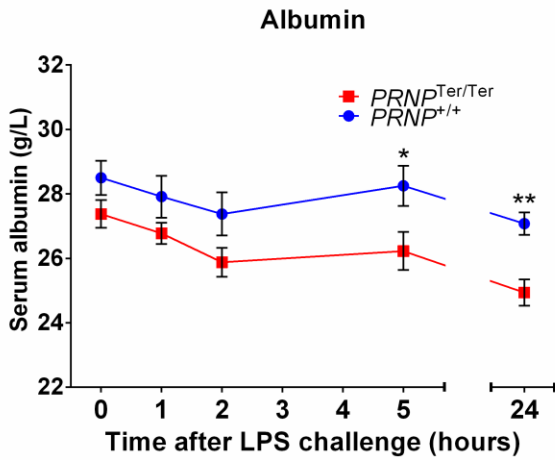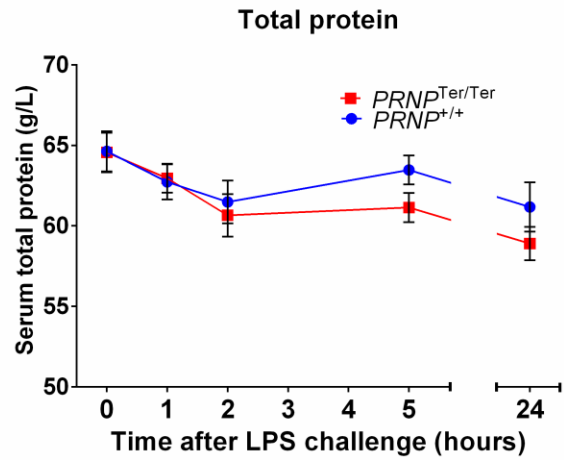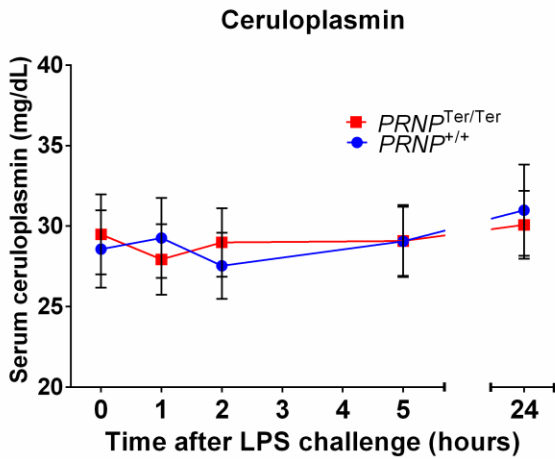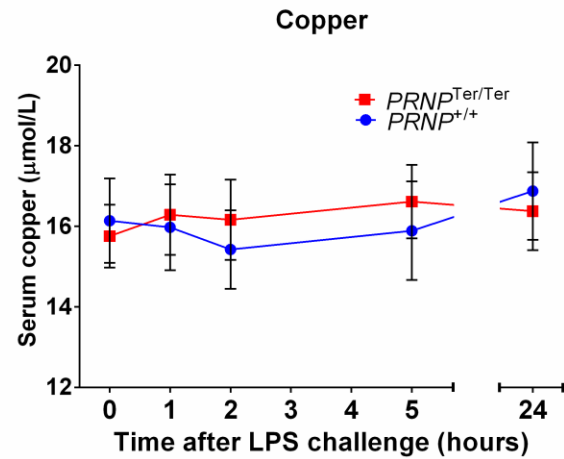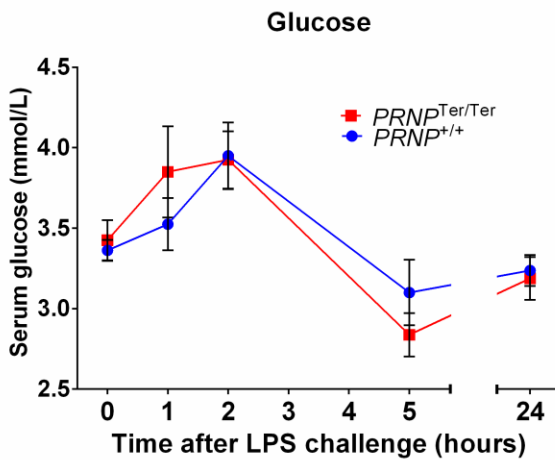

Supplement: MOESM2 [file 12305324]
