# Supplementary material for: LPS-induced systemic inflammation reveals an immunomodulatory role for the prion protein at the blood-brain interface
Source: Springer Nature journal article supplement (doi:10.1186/s12974-017-0879-5), 2017-05-22
Supplement: MOESM3 [file 12305324]

### Additional file 3. Differentially expressed genes in the choroid plexus after LPS challenge.

**a) Up-regulated genes in the choroid plexus after LPS challenge.** Differential expression analyses were performed by comparing the LPS-groups to the saline control group of matching genotype. Bold values indicate a significant up-regulation (\*log<sub>2</sub> ratio >0.59, q<0.05). LPS, n=15. Saline, n=10

| Gene ID   | Symbol   | Gene name                                                                  | Log <sub>2</sub> ratio |                         |
|-----------|----------|----------------------------------------------------------------------------|------------------------|-------------------------|
|           |          |                                                                            | PRNP <sup>+/+</sup>    | PRNP <sup>Ter/Ter</sup> |
| 102187851 | CXCL9    | C-X-C motif chemokine ligand 9                                             | <b>4,61*</b>           | <b>1,81*</b>            |
| 100860873 | CXCL10   | C-X-C motif chemokine ligand 10                                            | <b>4,46*</b>           | <b>3,24*</b>            |
| 102174264 | GBP6     | Guanylate binding protein family member 6                                  | <b>3,15*</b>           | <b>2,20*</b>            |
| 100860781 | SAA3     | Serum amyloid A3                                                           | <b>3,13*</b>           | <b>3,14*</b>            |
| 102188618 | MT1A     | Metallothionein-1A                                                         | <b>3,01*</b>           | <b>2,35*</b>            |
| 102190797 | RSAD2    | Radical S-adenosyl methionine domain containing 2                          | <b>2,89*</b>           | <b>1,92*</b>            |
| 102185230 | IFI6     | Interferon alpha inducible protein 6                                       | <b>2,77*</b>           | <b>0,73*</b>            |
| 102168687 | IFIT1    | Interferon-induced protein with tetratricopeptide repeats 1                | <b>2,42*</b>           | <b>2,13*</b>            |
| 102170076 | SELP     | Selectin P                                                                 | <b>2,37*</b>           | <b>2,27*</b>            |
| 102183943 | CD163    | Scavenger receptor cysteine-rich type 1 protein M130                       | <b>2,19*</b>           | <b>1,95*</b>            |
| 106503920 | APOL3    | Apolipoprotein L3-like                                                     | <b>2,16*</b>           | <b>2,08*</b>            |
| 102190722 | OAS1     | 2'-5'-oligoadenylate synthase 1                                            | <b>2,10*</b>           | <b>1,33*</b>            |
| 102168428 | SAA3     | Serum amyloid A protein                                                    | <b>2,07*</b>           | <b>1,99*</b>            |
| 102168968 | IFIT3    | Interferon induced protein with tetratricopeptide repeats 3                | <b>2,00*</b>           | <b>1,73*</b>            |
| 102185477 | TGM2     | Transglutaminase 2                                                         | <b>1,90*</b>           | <b>1,32*</b>            |
| 102169982 | ISG15    | ISG15 ubiquitin-like modifier                                              | <b>1,81*</b>           | <b>2,61*</b>            |
| 102177056 | CD14     | CD14 molecule                                                              | <b>1,57*</b>           | <b>1,41*</b>            |
| 102190983 | OAS1L    | 2'-5'-oligoadenylate synthase 1-like                                       | <b>1,52*</b>           | <b>1,77*</b>            |
| 102170273 | ICOSLG   | Inducible T-cell 1ostimulatory ligand                                      | <b>1,50*</b>           | <b>1,37*</b>            |
| 102174491 | LY6E     | Lymphocyte antigen 6 complex, locus E                                      | <b>1,42*</b>           | <b>1,23*</b>            |
| 102188635 | MX1      | MX dynamin like GTPase 1                                                   | <b>1,39*</b>           | <b>1,89*</b>            |
| 102180655 | IFITM3   | Interferon-induced transmembrane protein 3-like                            | <b>1,27*</b>           | <b>0,99*</b>            |
| 102184389 | MHCI     | BOLA class I histocompatibility antigen, alpha chain BL3-6-like            | <b>1,26*</b>           | <b>0,90*</b>            |
| 102191085 | COL6A1   | Collagen type VI alpha 1 chain                                             | <b>1,04*</b>           | <b>0,64*</b>            |
| 102171079 | COL4A1   | Collagen type IV alpha 1 chain                                             | <b>0,98*</b>           | <b>0,59*</b>            |
| 102174427 | RNF213   | Ring finger protein 213                                                    | <b>0,73*</b>           | <b>0,79*</b>            |
| 102191378 | COL6A2   | Collagen type VI alpha 2 chain                                             | <b>0,73*</b>           | <b>0,68*</b>            |
| 102173651 | PLVAP    | Plasmalemma vesicle associated protein                                     | <b>0,65*</b>           | <b>0,61*</b>            |
| 102170144 | GBP      | Guanylate-binding protein 1                                                | <b>2,63*</b>           | 1,64                    |
| 102189747 | HERC6    | HECT and RLD domain containing E3 ubiquitin protein ligase family member 6 | <b>2,59*</b>           | 1,73                    |
| 102176990 | OAS3     | 2'-5'-oligoadenylate synthase 1/3                                          | <b>2,49*</b>           | 1,55                    |
| 102169450 | IFIT2    | Interferon induced protein with tetratricopeptide repeats 2                | <b>2,29*</b>           | 1,57                    |
| 102181449 | PSMB9    | Proteasome subunit beta 9                                                  | <b>2,20*</b>           | 1,22                    |
| 102184087 | LGALS9   | Galectin 9                                                                 | <b>1,96*</b>           | 1,16                    |
| 102184922 | GVIN1    | Interferon-induced very large GTPase 1-like                                | <b>1,92*</b>           | 1,21                    |
| 102173932 | IFI203   | Interferon-activable protein 203-like                                      | <b>1,88*</b>           | 0,96                    |
| 102180902 | PSMB8    | Proteasome subunit beta 8                                                  | <b>1,81*</b>           | 0,93                    |
| 102180584 | MHCI     | BOLA class I histocompatibility antigen, alpha chain BL3-7-like            | <b>1,66*</b>           | 0,47                    |
| 102183942 | CAPN6    | Calpain 6                                                                  | <b>1,63*</b>           | 0,07                    |
| 100860825 | CHI3L1   | Chitinase 3 like 1                                                         | <b>1,58*</b>           | 1,46                    |
| 102181173 | TAP1     | Transporter 1, ATP binding cassette subfamily B member                     | <b>1,55*</b>           | 1,14                    |
| 102168630 | VCAN     | Versican                                                                   | <b>1,54*</b>           | 1,47                    |
| 102174541 | IGFBP3   | Insulin like growth factor binding protein 3                               | <b>1,37*</b>           | 0,88                    |
| 102173335 | TNFSF10  | Tumor necrosis factor superfamily member 10                                | <b>1,34*</b>           | 0,89                    |
| 102172487 | CP       | Ceruloplasmin (ferroxidase)                                                | <b>1,32*</b>           | 0,34                    |
| 102188739 | SRGN     | Serglycin                                                                  | <b>1,27*</b>           | 1,02                    |
| 102168722 | ARHGAP26 | Rho GTPase activating protein 26                                           | <b>1,26*</b>           | 0,67                    |

|           |          |                                                                 |              |              |
|-----------|----------|-----------------------------------------------------------------|--------------|--------------|
| 102174895 | VCAM     | Vascular cell adhesion protein 1                                | <b>1,23*</b> | 0,94         |
| 102188814 | MHCI     | BOLA class I histocompatibility antigen, alpha chain BL3-7-like | <b>1,23*</b> | 0,12         |
| 102171143 | APOL3    | Apolipoprotein L3                                               | <b>1,22*</b> | 1,20         |
| 102189585 | SCARA5   | Scavenger receptor class A member 5                             | <b>1,10*</b> | 0,52         |
| 102191086 | COCH     | Cochlin                                                         | <b>1,09*</b> | -0,49        |
| 102177631 | ADGRG6   | Adhesion G protein-coupled receptor G6                          | <b>1,05*</b> | -0,34        |
| 102178827 | TPM2     | Tropomyosin 2 (beta)                                            | <b>1,04*</b> | 0,32         |
| 102181402 | LCP1     | Lymphocyte cytosolic protein 1                                  | <b>1,01*</b> | 0,89         |
| 100860812 | IGFBP4   | Insulin like growth factor binding protein 4                    | <b>0,99*</b> | 0,28         |
| 102180712 | DES      | Desmin                                                          | <b>0,97*</b> | 0,57         |
| 102191633 | DKK3     | Dickkopf WNT signaling pathway inhibitor 3                      | <b>0,96*</b> | -0,22        |
| 102172386 | ADAMTS1  | ADAM metalloproteinase with thrombospondin type 1 motif 1       | <b>0,95*</b> | 0,43         |
| 102182694 | CXCL14   | C-X-C motif chemokine ligand 14                                 | <b>0,93*</b> | -0,09        |
| 102187830 | COL17A1  | Collagen type XVII alpha 1 chain                                | <b>0,83*</b> | -0,53        |
| 102180259 | C7       | Complement C7                                                   | <b>0,82*</b> | 0,20         |
| 102169556 | CXCL12   | C-X-C motif chemokine ligand 12                                 | <b>0,81*</b> | -0,09        |
| 102191486 | ACTA2    | Actin, alpha 2, smooth muscle, aorta                            | <b>0,80*</b> | 0,30         |
| 102190641 | MYLK     | Myosin light chain kinase                                       | <b>0,78*</b> | 0,23         |
| 102185937 | TAGLN    | Transgelin                                                      | <b>0,78*</b> | 0,37         |
| 102177315 | FBLN1    | Fibulin 1                                                       | <b>0,77*</b> | -0,02        |
| 102188376 | FGL2     | Fibrinogen like 2                                               | <b>0,75*</b> | 0,32         |
| 102172853 | COL16A1  | Collagen type XVI alpha 1 chain                                 | <b>0,74*</b> | -0,03        |
| 102177484 | C4       | Complement C4                                                   | <b>0,73*</b> | 0,08         |
| 102172761 | ITGA1    | Integrin subunit alpha 1                                        | <b>0,73*</b> | 0,06         |
| 102176966 | ACTN1    | Actinin alpha 1                                                 | <b>0,71*</b> | 0,31         |
| 100860938 | COL3A1   | Collagen type III alpha 1 chain                                 | <b>0,69*</b> | -0,14        |
| 102179435 | TPM3     | Tropomyosin 3                                                   | <b>0,66*</b> | 0,29         |
| 100860940 | COL1A2   | Collagen type I alpha 2 chain                                   | <b>0,65*</b> | 0,01         |
| 102188835 | C1R      | Complement C1r                                                  | <b>0,65*</b> | 0,22         |
| 102183179 | GRN      | Granulin                                                        | <b>0,65*</b> | 0,54         |
| 102175326 | PFN1     | Profilin 1                                                      | <b>0,63*</b> | 0,29         |
| 102180482 | TPM4     | Tropomyosin 4                                                   | <b>0,62*</b> | 0,51         |
| 102171347 | COL4A2   | Collagen type IV alpha 2 chain                                  | <b>0,62*</b> | 0,22         |
| 102181355 | PCOLCE   | Procollagen C-endopeptidase enhancer                            | <b>0,61*</b> | -0,10        |
| 102169304 | ENG      | Endoglin                                                        | <b>0,59*</b> | 0,24         |
| 102190143 | KCTD12   | Potassium channel tetramerization domain containing 12          | <b>0,59*</b> | -0,02        |
| 102174322 | FOLR3    | Folate receptor 3                                               | 1,11         | <b>1,84*</b> |
| 102183788 | DDX58    | DEXD/H-box helicase 58                                          | 1,11         | <b>1,62*</b> |
| 100861005 | SLC29A1  | Solute carrier family 29 member 1                               | 0,94         | <b>1,53*</b> |
| 102176743 | UBA7     | Ubiquitin like modifier activating enzyme 7                     | 0,93         | <b>1,09*</b> |
| 102186813 | C1QB     | Complement C1q B chain                                          | 0,92         | <b>1,05*</b> |
| 102179622 | DIRAS3   | DIRAS family GTPase 3                                           | 0,85         | <b>0,95*</b> |
| 102175447 | FKBP5    | FK506 binding protein 5                                         | 0,48         | <b>0,79*</b> |
| 102177374 | LGALS3BP | Galectin 3 binding protein                                      | 0,39         | <b>0,78*</b> |
| 102168267 | B2M      | Beta-2-microglobulin                                            | 0,58         | <b>0,68*</b> |

**b) Down-regulated genes in the choroid plexus after LPS challenge.** Differential expression analyses were performed by comparing the LPS-groups to the saline control group of matching genotype. Bold values indicate a true differential expression (\*log<sub>2</sub> ratio <0.59, q<0.05). LPS, n=15. Saline, n=10

| Gene ID   | Symbol       | Gene name                                                         | Log <sub>2</sub> ratio<br>LPS vs. saline |                                |
|-----------|--------------|-------------------------------------------------------------------|------------------------------------------|--------------------------------|
|           |              |                                                                   | <i>PRNP</i> <sup>+/+</sup>               | <i>PRNP</i> <sup>Ter/Ter</sup> |
| 102190015 | PK4          | Pyruvate dehydrogenase kinase 4                                   | <b>-1,47*</b>                            | <b>-1,27*</b>                  |
| 102172168 | GPR158       | G protein-coupled receptor 158                                    | <b>-0,66*</b>                            | <b>-0,66*</b>                  |
| 102180778 | RDH10        | Retinol dehydrogenase 10 (all-trans)                              | <b>-2,23*</b>                            | -0,51                          |
| 102187800 | UBB          | Ubiquitin B                                                       | <b>-1,40*</b>                            | 0,30                           |
| 102182855 | TXNRD1       | Thioredoxin reductase 1                                           | <b>-0,78*</b>                            | -0,36                          |
| 102169722 | TGFB3        | Transforming growth factor beta receptor 3                        | <b>-0,77*</b>                            | 0,10                           |
| 102175994 | TCAIM        | T-cell activation inhibitor, mitochondrial                        | <b>-0,75*</b>                            | -0,19                          |
| 102172797 | WNK1         | WNK lysine deficient protein kinase 1                             | <b>-0,69*</b>                            | -0,22                          |
| 102177581 | CACNA1H      | Voltage-dependent T-type calcium channel subunit alpha-1H         | <b>-0,67*</b>                            | -0,38                          |
| 102176607 | SGK1         | Serum/glucocorticoid regulated kinase 1                           | <b>-0,67*</b>                            | -0,23                          |
| 102187066 | PPFIBP2      | PPFIA binding protein 2                                           | <b>-0,66*</b>                            | -0,01                          |
| 102183532 | LRAT         | Lecithin retinol acyltransferase                                  | <b>-0,63*</b>                            | -0,34                          |
| 102184027 | RBP4         | Retinol binding protein 4                                         | <b>-0,63*</b>                            | -0,16                          |
| 102189710 | CLDN1        | Claudin 1                                                         | <b>-0,63*</b>                            | -0,03                          |
| 102184132 | METAP1       | Methionyl aminopeptidase 1                                        | <b>-0,62*</b>                            | 0,04                           |
| 102176354 | HP           | Haptoglobin                                                       | -0,29                                    | <b>-3,39*</b>                  |
| 102178465 | ZBTB16       | Zinc finger and BTB domain containing 16                          | -1,56                                    | <b>-2,21*</b>                  |
| 102175527 | CEMIP        | Cell migration inducing hyaluronan binding protein                | -0,06                                    | <b>-1,41*</b>                  |
| 102189939 | ATP5I        | ATP synthase, H+ transporting, mitochondrial Fo complex subunit E | 0,10                                     | <b>-1,18*</b>                  |
| 106503375 | C21H14orf132 | Chromosome 21 C14orf132 homolog                                   | -0,36                                    | <b>-0,82*</b>                  |
| 102183476 | ZYG11B       | Zyg-11 family member B, cell cycle regulator                      | -0,21                                    | <b>-0,73*</b>                  |
| 100860756 | OGN          | Osteoglycin                                                       | 0,18                                     | <b>-0,71*</b>                  |
| 102191385 | VWA5B1       | Von Willebrand factor A domain containing 5B1                     | -0,16                                    | <b>-0,63*</b>                  |
